# Supplementary material
Source: PubMed Central journal article supplement (PMC7755443)
Supplement: CONC-27-e569-S001.pdf [file CONC-27-e569-S001.pdf]

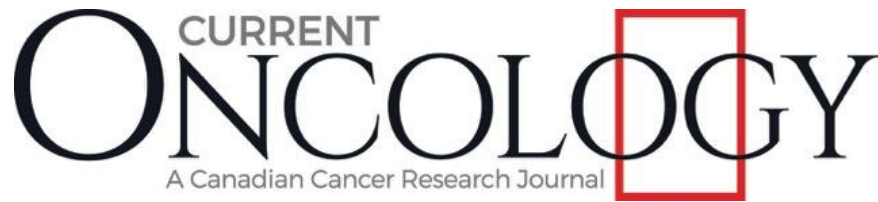

## **Supplemental Materials for**

### **Comprehensive genomic profiling for non-small cell lung cancer: health and budget impact**

K.M. Johnston PhD, B. Sheffield MD, S. Yip MD, P. Lakzadeh MSc, C. Qian MSc,  
J. Nam MSc.

#### **Listing of Supplemental Material(s):**

Supplemental Appendix 1: **Details of testing efficacy calculations**

Supplemental Appendix 2: **Details of infrastructure cost calculations**

## Supplementary Appendix

### Appendix 1: Details of testing efficacy calculations

For conventional genetic testing, genetic alterations considered were: EGFR, ALK, ROS1, BRAF, MET, HER2, RET, KRAS, noting that testing and treatment for MET, HER2, and RET were not considered applicable in Canada. The prevalence of mutations was reported in the literature by squamous and non-squamous histology type as summarized in the table below (Appendix 1 Table 1).

**Appendix 1 Table 1 Prevalence of alterations under conventional testing**

| Histology / Locus         | Prevalence of alterations<br>using conventional testing | Source         | Link                                                                                                                                |
|---------------------------|---------------------------------------------------------|----------------|-------------------------------------------------------------------------------------------------------------------------------------|
| <b>Non-squamous (70%)</b> |                                                         |                |                                                                                                                                     |
| EGFR                      | 17%                                                     | Kris 2014      | <a href="http://jama.jamanetwork.com/article.aspx?articleid=1872815">http://jama.jamanetwork.com/article.aspx?articleid=1872815</a> |
| ALK                       | 3%                                                      | Bergethon 2010 | <a href="https://www.ncbi.nlm.nih.gov/pmc/articles/PMC3295572/">https://www.ncbi.nlm.nih.gov/pmc/articles/PMC3295572/</a>           |
| ROS1                      | 1%                                                      | Gainor 2013    | <a href="https://www.ncbi.nlm.nih.gov/pmc/articles/PMC3720641/">https://www.ncbi.nlm.nih.gov/pmc/articles/PMC3720641/</a>           |
| BRAF                      | 2%                                                      | Kris 2014      | <a href="http://jama.jamanetwork.com/article.aspx?articleid=1872815">http://jama.jamanetwork.com/article.aspx?articleid=1872815</a> |
| MET                       | 1%                                                      | Kris 2014      | <a href="http://jama.jamanetwork.com/article.aspx?articleid=1872815">http://jama.jamanetwork.com/article.aspx?articleid=1872815</a> |
| HER2                      | 3%                                                      | Kris 2014      | <a href="http://jama.jamanetwork.com/article.aspx?articleid=1872815">http://jama.jamanetwork.com/article.aspx?articleid=1872815</a> |
| RET                       | 1%                                                      | Gainor 2013    | <a href="https://www.ncbi.nlm.nih.gov/pmc/articles/PMC3720641/">https://www.ncbi.nlm.nih.gov/pmc/articles/PMC3720641/</a>           |
| KRAS                      | 25%                                                     | Kris 2014      | <a href="http://jama.jamanetwork.com/article.aspx?articleid=1872815">http://jama.jamanetwork.com/article.aspx?articleid=1872815</a> |
| <b>Squamous (30%)</b>     |                                                         |                |                                                                                                                                     |

|            |    |            |                                                                                                                           |
|------------|----|------------|---------------------------------------------------------------------------------------------------------------------------|
| <b>MET</b> | 6% | Heist 2012 | <a href="https://www.ncbi.nlm.nih.gov/pmc/articles/PMC3404741/">https://www.ncbi.nlm.nih.gov/pmc/articles/PMC3404741/</a> |
|------------|----|------------|---------------------------------------------------------------------------------------------------------------------------|

The distribution of squamous (30%) and non-squamous (70%) NSCLC is from key statistics of lung cancer reported by American Cancer Society (<http://www.cancer.org/cancer/lungcancer-non-smallcell/detailedguide/non-small-cell-lung-cancer-what-is-non-small-cell-lung-cancer>).

The prevalence of mutations is calculated as a weighted average of the prevalence among non-squamous cancer and squamous cancer (Appendix 1 Table 2):

### Appendix 1 Table 2 Calculation of detection rates in the total NSCLC population for those tested conventionally

| Histology / Locus          | Prevalence of alterations              | Prevalence of alterations                            |
|----------------------------|----------------------------------------|------------------------------------------------------|
|                            | under conventional testing calculation | under conventional testing in total NSCLC population |
| <b>Non-squamous (70%);</b> |                                        |                                                      |
| <b>Squamous (30%)</b>      |                                        |                                                      |
| EGFR                       | 17%*.7                                 | 11.9%                                                |
| ALK                        | 3%*.7                                  | 2.1%                                                 |
| ROS1                       | 1%*.7                                  | 0.7%                                                 |
| BRAF                       | 2%*.7                                  | 1.4%                                                 |
| MET                        | 1%*.7+6.2*.3                           | 2.6%                                                 |
| HER2                       | 3%*.7                                  | 2.1%                                                 |
| RET                        | 1%*.7                                  | 0.7%                                                 |
| KRAS                       | 25%*.7                                 | 17.5%                                                |

Among patients receiving Foundation Medicine, detection rates were based on literature reporting detection rates specifically for Foundation Medicine testing (Appendix 1 Table 3).

### Appendix 1 Table 3 Prevalence of alterations with Foundation Medicine testing

| Locus                     | Prevalence of alterations | Source   | Link                                                                                                                                                                              |
|---------------------------|---------------------------|----------|-----------------------------------------------------------------------------------------------------------------------------------------------------------------------------------|
| with Foundation Medicine  |                           |          |                                                                                                                                                                                   |
| <b>Non-squamous (70%)</b> |                           |          |                                                                                                                                                                                   |
| EGFR                      | 20%                       | Suh 2016 | <a href="http://theoncologist.alphamedpress.org/cgi/pmidlookup?view=long&amp;pmid=27151654">http://theoncologist.alphamedpress.org/cgi/pmidlookup?view=long&amp;pmid=27151654</a> |
| ALK                       | 4.1%                      | Suh 2016 | <a href="http://theoncologist.alphamedpress.org/cgi/pmidlookup?view=long&amp;pmid=27151654">http://theoncologist.alphamedpress.org/cgi/pmidlookup?view=long&amp;pmid=27151654</a> |
| ROS1                      | 1.5%                      | Suh 2016 | <a href="http://theoncologist.alphamedpress.org/cgi/pmidlookup?view=long&amp;pmid=27151654">http://theoncologist.alphamedpress.org/cgi/pmidlookup?view=long&amp;pmid=27151654</a> |

|                       |      |                               |                                                                                                                                                                                   |
|-----------------------|------|-------------------------------|-----------------------------------------------------------------------------------------------------------------------------------------------------------------------------------|
| <b>BRAF</b>           | 5.7% | Suh 2016                      | <a href="http://theoncologist.alphamedpress.org/cgi/pmidlookup?view=long&amp;pmid=27151654">http://theoncologist.alphamedpress.org/cgi/pmidlookup?view=long&amp;pmid=27151654</a> |
| <b>MET</b>            | 5.6% | Suh 2016                      | <a href="http://theoncologist.alphamedpress.org/cgi/pmidlookup?view=long&amp;pmid=27151654">http://theoncologist.alphamedpress.org/cgi/pmidlookup?view=long&amp;pmid=27151654</a> |
| <b>HER2</b>           | 6.0% | Suh 2016                      | <a href="http://theoncologist.alphamedpress.org/cgi/pmidlookup?view=long&amp;pmid=27151654">http://theoncologist.alphamedpress.org/cgi/pmidlookup?view=long&amp;pmid=27151654</a> |
| <b>RET</b>            | 2.4% | Suh 2016                      | <a href="http://theoncologist.alphamedpress.org/cgi/pmidlookup?view=long&amp;pmid=27151654">http://theoncologist.alphamedpress.org/cgi/pmidlookup?view=long&amp;pmid=27151654</a> |
| <b>KRAS</b>           | 32%  | Suh 2016                      | <a href="http://theoncologist.alphamedpress.org/cgi/pmidlookup?view=long&amp;pmid=27151654">http://theoncologist.alphamedpress.org/cgi/pmidlookup?view=long&amp;pmid=27151654</a> |
| <b>Squamous (30%)</b> |      |                               |                                                                                                                                                                                   |
| <b>MET</b>            | 6%   | Heist et al.<br>review (2012) | <a href="https://www.ncbi.nlm.nih.gov/pmc/articles/PMC3404741/">https://www.ncbi.nlm.nih.gov/pmc/articles/PMC3404741/</a>                                                         |

The prevalence of mutations is calculated as a weighted average of the prevalence among non-squamous cancer and squamous cancer (Appendix 1 Table 4):

**Appendix 1 Table 4 Calculation of detection rates in the total NSCLC population for those tested with Foundation Medicine**

| Histology / Locus                         | Prevalence of alterations<br>under Foundation Medicine testing | Prevalence of alterations<br>under<br>Foundation<br>Medicine<br>testing in total<br>NSCLC<br>population |
|-------------------------------------------|----------------------------------------------------------------|---------------------------------------------------------------------------------------------------------|
| <b>Non-squamous (70%); Squamous (30%)</b> |                                                                |                                                                                                         |
| EGFR                                      | 20%*.7                                                         | 14%                                                                                                     |
| ALK                                       | 4.1%*.7                                                        | 2.9%                                                                                                    |
| ROS1                                      | 1.5%*.7                                                        | 1%                                                                                                      |
| BRAF                                      | 5.7%*.7                                                        | 4%                                                                                                      |
| MET                                       | 5.6%*.7+6.2%*.3                                                | 5.8%                                                                                                    |
| HER2                                      | 6.0%*.7                                                        | 4.2%                                                                                                    |
| RET                                       | 2.4%*.7                                                        | 1.7%                                                                                                    |
| KRAS                                      | 32%*.7                                                         | 22.4%                                                                                                   |

The average number of tests per person by reference and adoption scenarios (Appendix 1 Table 5):

**Appendix 1 Table 5 Average number of tests per person by reference and adoption scenarios (50% uptake for FoundationOne in all adoption scenarios).**

|                                                       | Reference scenario:<br>Conventional testing | Adoption scenario 1:<br>FoundationOne CDx replacing all reflex test | Adoption scenario 2:<br>FoundationOne CDx replacing panel | Adoption scenario 3:<br>FoundationOne CDx after negative reflex + panel | Adoption scenario 4:<br>FoundationOne Liquid only |
|-------------------------------------------------------|---------------------------------------------|---------------------------------------------------------------------|-----------------------------------------------------------|-------------------------------------------------------------------------|---------------------------------------------------|
| <b>Reference scenario 1: Single-gene testing only</b> |                                             |                                                                     |                                                           |                                                                         |                                                   |
| <b>Number of single-gene tests per-person</b>         | 3.4                                         | 2.2                                                                 | Not applicable                                            | Not applicable                                                          | 3.4                                               |

|                                                                            |     |     |     |     |     |      |
|----------------------------------------------------------------------------|-----|-----|-----|-----|-----|------|
| <b>Number of hotspot panels per-person</b>                                 | 0   | 0   |     |     |     | 0    |
| <b>Number of Foundation Medicine tests per-person</b>                      | 0   | 0.5 |     |     |     | 0.05 |
| <b>Reference scenario 2: Single-gene testing followed by hotspot panel</b> |     |     |     |     |     |      |
| <b>Number of single-gene tests per-person</b>                              | 2.5 | 1.7 | 2.5 | 2.5 | 2.5 | 2.5  |
| <b>Number of hotspot panels per-person</b>                                 | 0.8 | 0.4 | 0.4 | 0.8 | 0.8 | 0.8  |
| <b>Number of Foundation Medicine tests per-person</b>                      | 0   | 0.5 | 0.4 | 0.4 | 0.4 | 0.05 |

## Appendix 2: Details of infrastructure cost calculations

The costs of conventional testing vary by specific test and method used (e.g. in-house versus external laboratory). To comprehensively capture all relevant costs, a structured interview was conducted to collect relevant costing inputs from a large genomics laboratory in British Columbia. Based on tis, annual operating budget, and allocation of capital and staffing costs were taken into consideration to appropriately adjust for the volume of laboratory work associated with NSCLC specifically.

Specifically, the following components were collected: estimated annual purchasing cost of all equipment used for NSCLC testing, annual NSCLC-specific operational costs consisting of equipment maintenance, material, labor, and other costs comprise reporting, shipping, software updates, and test validation and calibration costs. Testing-related costs were further broken down into specific testing methods of IHC, FISH, PCR, AC-based NGS, and HC-based NGS.

All costs and calculations are summarized below in Appendix 2 Table 1 & Table 2:

**Appendix 2 Table 1 Test-specific costs**

|                                                            | CAPITAL COST |                     | EQUIPMENT MAINTENANCE COST |                    | MATERIAL COST          |
|------------------------------------------------------------|--------------|---------------------|----------------------------|--------------------|------------------------|
|                                                            | TOTAL        | NSCLC               | TOTAL                      | NSCLC              |                        |
| IHC                                                        | \$ 29,479.17 | \$ 2,210.94         | \$ 10,000.00               | \$ 750.00          | \$ 52,000.00           |
| FISH                                                       | \$ 39,479.17 | \$ 39.48            | \$ 13,750.00               | \$ 13.75           |                        |
| PCR                                                        | \$ 20,145.83 | \$ 241.75           | \$ 6,500.00                | \$ 78.00           |                        |
| AC-BASED NGS                                               | \$ 69,479.17 | \$ -                | \$ 25,000.00               | \$ -               | \$ -                   |
| HC-BASED NGS                                               | \$ 69,479.00 | \$ 16,675.00        | \$ 25,000.00               | \$ 6,000.00        | \$ 1,274,000.00        |
| <b>TOTAL ANNUAL CAPITAL COST<br/>ATTRIBUTABLE TO NSCLC</b> |              | <b>\$ 19,167.00</b> |                            | <b>\$ 6,841.75</b> | <b>\$ 1,326,000.00</b> |



Appendix 2 Table 2 Non-test specific costs

| <b>OPERATIONAL COST - LABOUR COST (ANNUAL)</b>             |              |              |
|------------------------------------------------------------|--------------|--------------|
|                                                            | <b>TOTAL</b> | <b>NSCLC</b> |
| <b>TECHNICIANS/ADMIN STAFF</b>                             | \$ 1,600,000 | \$ 240,000   |
| <b>ADMIN STAFF</b>                                         | \$ 320,000   | \$ 48,000    |
| <b>MANAGEMENT STAFF</b>                                    | \$ 360,000   | \$ 54,000    |
| <b>MEDICAL/SCIENTIFIC STAFF</b>                            | \$ 950,000   | \$ 142,500   |
| <b>PATHOLOGISTS</b>                                        | \$ 118,750   | \$ 17,813    |
| <b>TOTAL ANNUAL LABOUR COST ATTRIBUTABLE TO NSCLC</b>      |              | \$ 502,313   |
| <b>OPERATIONAL COST - OTHER COSTS (ANNUAL)</b>             |              |              |
|                                                            | <b>TOTAL</b> | <b>NSCLC</b> |
| <b>TEST VALIDATION</b>                                     | \$ 6,700     | \$ 670       |
| <b>TEST CALIBRATION</b>                                    | \$ -         |              |
| <b>SOFTWARE UPDATES</b>                                    | \$ 2,000     | \$ 300       |
| <b>SHIPPING</b>                                            | \$ 130,000   | \$ 130,000   |
| <b>REPORTING</b>                                           | \$ 105,000   | \$ 15,750    |
| <b>OTHER</b>                                               | \$ -         | \$ -         |
| <b>TOTAL ANNUAL MAINTENANCE COST ATTRIBUTABLE TO NSCLC</b> |              | \$ 146,050   |

Total costs are summarized below in Appendix 3 Table 3:

Appendix 2 Table 3 Summarized costs

|            | <b>OPERATIONAL<br/>COST - MATERIALS<br/>ONLY</b> | <b>ALL OTHER COSTS</b> | <b>NUMBER OF TESTS<br/>ANNUALLY</b> | <b>ESTIMATED COST<br/>PER TEST</b> |
|------------|--------------------------------------------------|------------------------|-------------------------------------|------------------------------------|
| <b>IHC</b> | \$ 52,000.00                                     | \$ 674,371.42          | 390                                 | \$ 652.08                          |
| <b>NGS</b> | \$ 1,274,000.00                                  |                        | 1300                                | \$ 1,918.75                        |
